# Supplementary material for: Influence of Five Potential Anticancer Drugs on Wnt Pathway and Cell Survival in Human Biliary Tract Cancer Cells
Source: PubMed Central journal article supplement — Int J Biol Sci. 2011 Nov 7;8(1):15–29. doi: 10.7150/ijbs.8.15 (PMC3226029; doi:10.7150/ijbs.8.15), 2011-11-07
Supplement: ijbsv08p0015s1.pdf [file ijbsv08p0015s1.pdf]

## Supplementary Material

**Table S1. Sequences of oligonucleotides used for real-time reverse transcription PCR.**

| Name / abbreviation | Gene name <sup>a</sup>                                   | ID <sup>b</sup> | Sequence, forward / reverse                              |
|---------------------|----------------------------------------------------------|-----------------|----------------------------------------------------------|
| Axin2               | axin 2                                                   | 0168646         | GTCCACCACCACTACATCCACCA /<br>TGCCTTTCCATTGCGTTTG         |
| β-Actin             | actin, beta                                              | 0075624         | GAGCACAGAGCCTCGCCTTTG /<br>CTGACCCATGCCACCATCA           |
| β-Catenin           | catenin (cadherin-associated protein), beta 1, 88kDa     | 0168036         | CTCTGATAAAGGCTACTGTTGGATTGATTC /<br>TTGCTGCTGTGTCCCACCCA |
| Vimentin            | vimentin                                                 | 0026025         | GGAAGCCGAAAACACCCTGC /<br>TGAGGTCAGGCTTGGAAACATCC        |
| p27                 | cyclin-dependent kinase inhibitor 1B (p27, Kip1)         | 0111276         | TACGAGTGGCAAGAGGTGGAGAAG /<br>CGACGGATCAGTCTTTGGGTCC     |
| Cyclin D1           | cyclin D1                                                | 0110092         | CTGGATGCTGGAGGTCTGCGAG /<br>GCCGTCAGGGGGATGGTCTC         |
| TCF7L1              | transcription factor 7-like 1 (T-cell specific, HMG-box) | 0152284         | ATCCTTGAAGAAAGTGGCACAACC /<br>TGCTGCTGTGACTGTGTCTGGGA    |
| TCF7L2              | transcription factor 7-like 2 (T-cell specific, HMG-box) | 0148737         | CTGGCACCGTAGGACAAATCCC /<br>CGTCGTGTGTAGCGTATGATGTGGT    |
| Ck7                 | keratin 7                                                | 0135480         | GCAGGATGTGGTGGAGGACTTC /<br>TGAGGGTCCTGAGGAAGTTGATCTC    |
| CK8                 | keratin 8                                                | 0170421         | CTTGGCAACATGCAGGGGCT /<br>CTGAGGAAGTTGATCTCGTCGGTC       |
| Ck18                | keratin 18                                               | 0111057         | AATGCCCGTCTTGCTGCTGA /<br>GCCTTTTACTTCCTTTCGTGGTTC       |
| Ck19                | keratin 19                                               | 0171345         | CAGGTCAGTGTGGAGGTGGATTC /<br>AGTAACCTCGGACCTGCTCATCTG    |
| E-Cadherin          | cadherin 1, type 1, E-Cadherin (epithelial)              | 0039068         | CACTCTTTCTCTCACGCTGTGTCA /<br>GGTGTTACATCATCGTCCGC       |

<sup>a</sup> Source: <http://www.ensembl.org>

<sup>b</sup> Ensembl ID "ENSG0000\*"

**Table S2. Primary antibodies** (pre-treatment: water bath at pH 9).

| <b>Antigen specificity</b> | <b>Vendor</b>             | <b>Catalogue No.</b> | <b>Dilution</b> |
|----------------------------|---------------------------|----------------------|-----------------|
| $\beta$ -Catenin           | DakoCytomation            | M3539                | 1:200           |
| Cyclin-D1                  | Thermo Fischer Scientific | RM-9104              | 1:50            |
| E-Cadherin                 | Thermo Fischer Scientific | MS-9470              | 1:100           |
| Ki67                       | DakoCytomation            | M7249                | 1:500           |
| p27                        | DakoCytomation            | M7203                | 1:100           |
| p53                        | DakoCytomation            | M7001                | 1:200           |
| Vimentin                   | DakoCytomation            | M0725                | 1:200           |

**Table S3. Immunocytochemistry raw data.**

| Cell line      | Ck7 <sup>a</sup> | Ck8/18 <sup>a</sup> | Ck19 <sup>a</sup> | E-Cadherin <sup>a</sup> | β-catenin |          |         |
|----------------|------------------|---------------------|-------------------|-------------------------|-----------|----------|---------|
|                |                  |                     |                   |                         | cytoplasm | membrane | nucleus |
| <b>CCLP-1</b>  | 5.0 <sup>b</sup> | 11.8                | 0.0               | 0.0                     | 194.6     | 0.0      | 36.6    |
| <b>CCSW-1</b>  | 20.4             | 129.7               | 11.5              | 0.0                     | 77.9      | 48.1     | 35.1    |
| <b>BDC</b>     | 285.0            | 300.0               | 240.0             | 80.0                    | 100.0     | 20.0     | 0.0     |
| <b>EGI-1</b>   | 0.0              | 244.1               | 151.1             | 287.7                   | 87.5      | 60.0     | 73.8    |
| <b>MzChA-1</b> | 139.4            | 170.9               | 269.0             | 42.9                    | 18.2      | 0.0      | 0.0     |
| <b>MzChA-2</b> | 0.0              | 173.9               | 4.8               | 22.9                    | 78.7      | 0.0      | 0.0     |
| <b>SkChA-1</b> | 177.1            | 258.3               | 262.5             | 47.3                    | 57.7      | 0.0      | 0.0     |
| <b>TFK-1</b>   | 163.9            | 177.0               | 86.5              | 195.1                   | 22.3      | 284.8    | 0.0     |
| <b>GBC</b>     | 296.9            | 295.8               | 286.5             | 200.0                   | 19.0      | 181.2    | 0.0     |

<sup>a</sup> Data based on [Kiesslich T, Alinger B, Wolkersdorfer GW, et al. Active Wnt signalling is associated with low differentiation and high proliferation in human biliary tract cancer in vitro and in vivo and is sensitive to pharmacological inhibition. *Int J Oncol.* 2010; 36:49-58.]

<sup>b</sup> Semi-quantitative immunocytochemistry, quick score [Detre S, Saclani Jotti G, Dowsett M. A "quickscore" method for immunohistochemical semiquantitation: validation for oestrogen receptor in breast carcinomas. *J Clin Pathol.* 1995; 48:876-878]
